# Supplementary material for: Modelling the influenza disease burden in people aged 50–64 and ≥65 years in Australia
Source: PubMed Central journal article supplement (PMC8692809; doi:10.1111/irv.12902), 2021-09-29
Supplement: IRV-16-132-s001.pdf [file IRV-16-132-s001.pdf]

## Supplementary

Table S1. Estimated annual influenza-attributable hospitalisation rate by principal diagnosis and year, 50-64 and 65 years and over, Australia, 2001-2017.

### a. Influenza/pneumonia and respiratory

| Principal diagnosis     | Year           | Hospitalisation rate* – attributable to influenza (95%CI) |                             |
|-------------------------|----------------|-----------------------------------------------------------|-----------------------------|
|                         |                | Age group                                                 |                             |
|                         |                | 50-64 years                                               | ≥65 years                   |
| Influenza/<br>pneumonia | 2001 (Jul-Dec) | <b>14.6 (10.9, 18.2)</b>                                  | <b>41.9 (29.8, 53.9)</b>    |
|                         | 2002           | <b>20.0 (15.7, 24.2)</b>                                  | <b>110.3 (96.3, 124.2)</b>  |
|                         | 2003           | <b>29.7 (26.5, 32.9)</b>                                  | <b>145.7 (135.2, 156.1)</b> |
|                         | 2004           | <b>29.3 (25.0, 33.6)</b>                                  | <b>134.9 (120.7, 149.0)</b> |
|                         | 2005           | <b>27.7 (23.1, 32.3)</b>                                  | <b>105.7 (90.4, 120.9)</b>  |
|                         | 2006           | <b>13.6 (9.2, 18.0)</b>                                   | <b>54.9 (40.4, 69.4)</b>    |
|                         | 2007           | <b>17.7 (14.4, 21.1)</b>                                  | <b>67.1 (56.1, 78.0)</b>    |
|                         | 2008           | <b>19.3 (15.5, 23.1)</b>                                  | <b>86.2 (73.7, 98.8)</b>    |
|                         | 2009           | <b>42.0 (38.8, 45.2)</b>                                  | <b>48.7 (38.2, 59.3)</b>    |
|                         | 2010           | <b>20.7 (16.7, 24.8)</b>                                  | <b>31.1 (17.7, 44.5)</b>    |
|                         | 2011           | <b>12.0 (7.3, 16.8)</b>                                   | -5.9 (-21.6, 9.8)           |
|                         | 2012           | <b>38.3 (34.3, 42.2)</b>                                  | <b>179.6 (166.4, 192.7)</b> |
|                         | 2013           | <b>36.3 (31.5, 41.1)</b>                                  | <b>67.5 (51.7, 83.2)</b>    |
|                         | 2014           | <b>59.0 (55.1, 62.8)</b>                                  | <b>130.1 (117.5, 142.8)</b> |
|                         | 2015           | <b>33.4 (29.6, 37.1)</b>                                  | <b>142.0 (129.6, 154.5)</b> |
|                         | 2016           | <b>45.7 (41.3, 50.1)</b>                                  | <b>227.0 (212.6, 241.4)</b> |
|                         | 2017           | <b>98.9 (95.2, 102.6)</b>                                 | <b>459.1 (446.7, 471.4)</b> |
| Respiratory             | 2001 (Jul-Dec) | <b>61.3 (52.1, 70.4)</b>                                  | <b>116.8 (88.8, 144.7)</b>  |
|                         | 2002           | <b>64.4 (53.8, 75.0)</b>                                  | <b>332.1 (299.8, 364.4)</b> |
|                         | 2003           | <b>94.2 (86.3, 102.1)</b>                                 | <b>427.5 (403.3, 451.7)</b> |
|                         | 2004           | <b>60.0 (49.3, 70.8)</b>                                  | <b>319.6 (286.9, 352.4)</b> |
|                         | 2005           | <b>78.8 (67.3, 90.4)</b>                                  | <b>342.9 (307.6, 378.2)</b> |
|                         | 2006           | <b>66.0 (55.0, 77.1)</b>                                  | <b>241.2 (207.6, 274.8)</b> |
|                         | 2007           | <b>57.4 (49.0, 65.7)</b>                                  | <b>161.3 (135.8, 186.7)</b> |
|                         | 2008           | <b>87.2 (77.6, 96.7)</b>                                  | <b>278.9 (249.9, 308.0)</b> |
|                         | 2009           | <b>75.3 (67.3, 83.3)</b>                                  | <b>111.6 (87.1, 136.0)</b>  |
|                         | 2010           | <b>24.1 (13.9, 34.3)</b>                                  | 20.5 (-10.6, 51.6)          |
|                         | 2011           | <b>33.9 (22.0, 45.8)</b>                                  | <b>53.5 (17.2, 89.8)</b>    |
|                         | 2012           | <b>100.0 (90.0, 110.0)</b>                                | <b>468.3 (437.8, 498.8)</b> |
|                         | 2013           | <b>100.3 (88.4, 112.3)</b>                                | <b>197.2 (160.8, 233.6)</b> |
|                         | 2014           | <b>116.0 (106.4, 125.7)</b>                               | <b>300.2 (270.8, 329.6)</b> |
|                         | 2015           | <b>67.7 (58.2, 77.1)</b>                                  | <b>306.0 (277.2, 334.9)</b> |
|                         | 2016           | <b>111.3 (100.4, 122.3)</b>                               | <b>396.6 (363.2, 429.9)</b> |
|                         | 2017           | <b>139.3 (129.9, 148.7)</b>                               | <b>638.0 (609.4, 666.7)</b> |

\* Rate per 100,000 population.

Statistically significant years are presented in bold font.

b. Myocardial infarction and circulatory

| Principal diagnosis   | Year           | Hospitalisation rate* – attributable to influenza (95%CI) |                             |
|-----------------------|----------------|-----------------------------------------------------------|-----------------------------|
|                       |                | Age group                                                 |                             |
|                       |                | 50-64 years                                               | ≥65 years                   |
| Myocardial infarction | 2001 (Jul-Dec) | -5.9 (-10.1, -1.7)                                        | <b>19.1 (9.0, 29.1)</b>     |
|                       | 2002           | 2.8 (-2.0, 7.7)                                           | <b>28.9 (17.2, 40.5)</b>    |
|                       | 2003           | 3.1 (-0.5, 6.7)                                           | <b>27.0 (18.2, 35.7)</b>    |
|                       | 2004           | 0.4 (-4.5, 5.3)                                           | <b>18.9 (7.1, 30.7)</b>     |
|                       | 2005           | <b>9.2 (3.9, 14.5)</b>                                    | <b>56.7 (44.0, 69.4)</b>    |
|                       | 2006           | <b>6.3 (1.3, 11.4)</b>                                    | <b>14.6 (2.5, 26.8)</b>     |
|                       | 2007           | 2.2 (-1.7, 6.0)                                           | <b>15.0 (5.9, 24.2)</b>     |
|                       | 2008           | <b>6.2 (1.9, 10.6)</b>                                    | <b>14.2 (3.7, 24.6)</b>     |
|                       | 2009           | 3.3 (-0.4, 6.9)                                           | <b>12.9 (4.8, 20.9)</b>     |
|                       | 2010           | -6.2 (-10.9, -1.6)                                        | 0.8 (-9.4, 11.0)            |
|                       | 2011           | -1.9 (-7.3, 3.5)                                          | -4.4 (-16.3, 7.5)           |
|                       | 2012           | 2.8 (-1.7, 7.4)                                           | <b>16.0 (6.0, 26.1)</b>     |
|                       | 2013           | -0.3 (-5.7, 5.1)                                          | -7.4 (-19.4, 4.6)           |
|                       | 2014           | -0.2 (-4.6, 4.2)                                          | -3.5 (-13.2, 6.2)           |
|                       | 2015           | -5.4 (-9.7, -1.1)                                         | 6.8 (-2.7, 16.3)            |
|                       | 2016           | 1.1 (-3.9, 6.1)                                           | 0.1 (-10.9, 11.1)           |
|                       | 2017           | <b>5.6 (1.3, 9.9)</b>                                     | <b>19.0 (9.6, 28.5)</b>     |
| Circulatory           | 2001 (Jul-Dec) | 3.1 (-18.2, 24.3)                                         | 39.0 (-16.4, 94.3)          |
|                       | 2002           | 17.3 (-7.3, 41.9)                                         | <b>168.2 (104.2, 232.3)</b> |
|                       | 2003           | -15.9 (-34.4, 2.5)                                        | 24.1 (-23.9, 72.2)          |
|                       | 2004           | 9.2 (-15.8, 34.1)                                         | 34.1 (-30.9, 99.1)          |
|                       | 2005           | 0.2 (-26.7, 27.1)                                         | <b>193.0 (123.0, 263.0)</b> |
|                       | 2006           | 26.0 (0.3, 51.6)                                          | <b>78.9 (12.1, 145.7)</b>   |
|                       | 2007           | -15.7 (-35.1, 3.7)                                        | 14.6 (-35.9, 65.1)          |
|                       | 2008           | 20.4 (-1.7, 42.6)                                         | <b>64.4 (6.8, 122.1)</b>    |
|                       | 2009           | -5.0 (-23.6, 13.6)                                        | <b>48.5 (2.2, 94.8)</b>     |
|                       | 2010           | 7.8 (-15.8, 31.4)                                         | 6.2 (-52.7, 65.0)           |
|                       | 2011           | -6.4 (-34.1, 21.2)                                        | 10.7 (-58.1, 79.5)          |
|                       | 2012           | 1.2 (-22.0, 24.4)                                         | 48.8 (-9.1, 106.6)          |
|                       | 2013           | -44.1 (-71.9, -16.4)                                      | -8.7 (-77.8, 60.4)          |
|                       | 2014           | 0.6 (-21.8, 23.0)                                         | 47.7 (-8.1, 103.5)          |
|                       | 2015           | <b>24.8 (2.9, 46.8)</b>                                   | <b>131.7 (77.0, 186.4)</b>  |
|                       | 2016           | -3.7 (-29.1, 21.6)                                        | <b>65.4 (2.2, 128.7)</b>    |
|                       | 2017           | -13.4 (-35.2, 8.4)                                        | -2.9 (-57.2, 51.4)          |

\* Rate per 100,000 population.

Statistically significant years are presented in bold font.

Table S2. Estimated annual influenza-attributable mortality rate by principal diagnosis and year, 50-64 and 65 years and over, Australia, 2001-2017.

a. Influenza/pneumonia and respiratory

| Principal cause of death | Year | Death rate* – attributable to influenza (95%CI) |                          |
|--------------------------|------|-------------------------------------------------|--------------------------|
|                          |      | Age group                                       |                          |
|                          |      | 50-64 years                                     | ≥65 years                |
| Influenza/<br>pneumonia  | 2001 | -0.1 (-0.5, 0.3)                                | 2.2 (0.0, 4.5)           |
|                          | 2002 | -0.6 (-1.0, -0.2)                               | <b>13.3 (10.9, 15.7)</b> |
|                          | 2003 | 0.3 (0.0, 0.6)                                  | <b>11.7 (9.9, 13.5)</b>  |
|                          | 2004 | 0.2 (-0.2, 0.6)                                 | 2.3 (-0.2, 4.7)          |
|                          | 2005 | 0.6 (0.2, 1.1)                                  | <b>13.1 (10.5, 15.7)</b> |
|                          | 2006 | 0.2 (-0.3, 0.6)                                 | <b>4.6 (2.0, 7.1)</b>    |
|                          | 2007 | -0.2 (-0.5, 0.2)                                | 2.7 (0.8, 4.6)           |
|                          | 2008 | 0.2 (-0.2, 0.6)                                 | 0.6 (-1.6, 2.8)          |
|                          | 2009 | 0.2 (-0.2, 0.5)                                 | 1.9 (0.0, 3.7)           |
|                          | 2010 | 1.2 (0.8, 1.6)                                  | -0.1 (-2.5, 2.2)         |
|                          | 2011 | 1.6 (1.1, 2.1)                                  | -1.1 (-3.9, 1.6)         |
|                          | 2012 | 0.5 (0.1, 0.9)                                  | <b>10.3 (8.0, 12.6)</b>  |
|                          | 2013 | 0.4 (-0.1, 0.9)                                 | -1.5 (-4.2, 1.3)         |
|                          | 2014 | 0.8 (0.4, 1.2)                                  | <b>6.4 (4.2, 8.6)</b>    |
|                          | 2015 | 0.1 (-0.3, 0.5)                                 | <b>10.4 (8.3, 12.6)</b>  |
|                          | 2016 | 0.9 (0.5, 1.3)                                  | <b>11.0 (8.5, 13.5)</b>  |
|                          | 2017 | <b>1.9 (1.5, 2.2)</b>                           | <b>36.1 (34.0, 38.3)</b> |
| Respiratory              | 2001 | 0.2 (-0.8, 1.1)                                 | <b>9.5 (4.7, 14.3)</b>   |
|                          | 2002 | 0.1 (-0.9, 1.1)                                 | <b>34.4 (29.3, 39.5)</b> |
|                          | 2003 | 1.2 (0.5, 2.0)                                  | <b>27.0 (23.1, 30.8)</b> |
|                          | 2004 | -0.3 (-1.3, 0.7)                                | <b>13.2 (8.1, 18.3)</b>  |
|                          | 2005 | <b>2.6 (1.5, 3.7)</b>                           | <b>23.9 (18.3, 29.5)</b> |
|                          | 2006 | -0.3 (-1.4, 0.7)                                | <b>14.1 (8.8, 19.5)</b>  |
|                          | 2007 | 0.1 (-0.7, 0.9)                                 | <b>4.1 (0.1, 8.1)</b>    |
|                          | 2008 | 0.2 (-0.7, 1.1)                                 | <b>5.8 (1.2, 10.4)</b>   |
|                          | 2009 | 1.1 (0.4, 1.9)                                  | <b>11.4 (7.6, 15.3)</b>  |
|                          | 2010 | 0.6 (-0.3, 1.6)                                 | 4.5 (-0.4, 9.3)          |
|                          | 2011 | 0.7 (-0.5, 1.8)                                 | -1.9 (-7.7, 3.9)         |
|                          | 2012 | <b>2.3 (1.4, 3.3)</b>                           | <b>30.1 (25.2, 34.9)</b> |
|                          | 2013 | -0.2 (-1.3, 1.0)                                | <b>11.4 (5.6, 17.2)</b>  |
|                          | 2014 | <b>3.0 (2.1, 3.9)</b>                           | <b>21.3 (16.6, 25.9)</b> |
|                          | 2015 | -0.2 (-1.1, 0.7)                                | <b>22.1 (17.5, 26.7)</b> |
|                          | 2016 | <b>2.6 (1.6, 3.6)</b>                           | <b>24.4 (19.1, 29.7)</b> |
|                          | 2017 | <b>1.9 (1.0, 2.8)</b>                           | <b>47.2 (42.7, 51.8)</b> |

\* Rate per 100,000 population.

Statistically significant years are presented in bold font.

b. Myocardial infarction and circulatory

| Principal cause of death | Year | Death rate* – attributable to influenza (95%CI) |                             |
|--------------------------|------|-------------------------------------------------|-----------------------------|
|                          |      | Age group                                       |                             |
|                          |      | 50-64 years                                     | ≥65 years                   |
| Myocardial infarction    | 2001 | 1.9 (0.8, 3.0)                                  | <b>10.8 (4.9, 16.8)</b>     |
|                          | 2002 | 0.5 (-0.7, 1.7)                                 | <b>31.1 (24.8, 37.4)</b>    |
|                          | 2003 | -0.2 (-1.2, 0.7)                                | <b>18.1 (13.4, 22.9)</b>    |
|                          | 2004 | 0.3 (-0.9, 1.6)                                 | <b>10.5 (4.1, 16.8)</b>     |
|                          | 2005 | -0.9 (-2.2, 0.4)                                | <b>37.5 (30.6, 44.4)</b>    |
|                          | 2006 | 0.0 (-1.2, 1.3)                                 | <b>14.2 (7.6, 20.8)</b>     |
|                          | 2007 | -0.5 (-1.4, 0.5)                                | <b>6.6 (1.6, 11.6)</b>      |
|                          | 2008 | -0.1 (-1.2, 1.0)                                | <b>15.6 (9.9, 21.3)</b>     |
|                          | 2009 | 0.1 (-0.8, 1.0)                                 | <b>11.0 (6.4, 15.5)</b>     |
|                          | 2010 | 1.0 (-0.2, 2.1)                                 | -2.0 (-7.7, 3.8)            |
|                          | 2011 | 0.0 (-1.3, 1.4)                                 | <b>11.3 (4.5, 18.1)</b>     |
|                          | 2012 | 0.9 (-0.2, 2.1)                                 | <b>20.5 (14.8, 26.2)</b>    |
|                          | 2013 | 1.7 (0.3, 3.0)                                  | 0.5 (-6.3, 7.2)             |
|                          | 2014 | 0.8 (-0.4, 1.9)                                 | <b>9.3 (3.8, 14.9)</b>      |
|                          | 2015 | -0.1 (-1.2, 1.0)                                | <b>6.1 (0.7, 11.5)</b>      |
|                          | 2016 | -0.9 (-2.1, 0.4)                                | <b>6.8 (0.6, 12.9)</b>      |
|                          | 2017 | 0.5 (-0.6, 1.6)                                 | <b>7.5 (2.1, 12.8)</b>      |
| Circulatory              | 2001 | 1.1 (-0.9, 3.1)                                 | <b>22.3 (9.2, 35.5)</b>     |
|                          | 2002 | 0.7 (-1.4, 2.8)                                 | <b>122.8 (108.8, 136.7)</b> |
|                          | 2003 | 1.1 (-0.5, 2.7)                                 | <b>39.2 (28.6, 49.7)</b>    |
|                          | 2004 | -0.6 (-2.7, 1.5)                                | <b>23.6 (9.5, 37.7)</b>     |
|                          | 2005 | 1.0 (-1.3, 3.4)                                 | <b>105.5 (90.2, 120.8)</b>  |
|                          | 2006 | 2.3 (0.1, 4.6)                                  | <b>30.1 (15.4, 44.8)</b>    |
|                          | 2007 | 1.5 (-0.2, 3.2)                                 | <b>23.1 (12.1, 34.2)</b>    |
|                          | 2008 | -0.8 (-2.7, 1.1)                                | <b>26.8 (14.2, 39.5)</b>    |
|                          | 2009 | 0.0 (-1.6, 1.6)                                 | <b>29.0 (19.2, 38.8)</b>    |
|                          | 2010 | 0.9 (-1.1, 2.9)                                 | 0.7 (-11.7, 13)             |
|                          | 2011 | 0.3 (-2.1, 2.7)                                 | <b>28.7 (14.1, 43.4)</b>    |
|                          | 2012 | <b>3.9 (1.9, 5.9)</b>                           | <b>69.2 (56.9, 81.5)</b>    |
|                          | 2013 | 0.1 (-2.3, 2.4)                                 | 10.8 (-3.8, 25.4)           |
|                          | 2014 | 1.0 (-0.9, 3.0)                                 | <b>26.9 (15.1, 38.8)</b>    |
|                          | 2015 | 0.3 (-1.6, 2.2)                                 | <b>27.7 (16.1, 39.4)</b>    |
|                          | 2016 | -0.8 (-2.9, 1.4)                                | 13.9 (0.6, 27.2)            |
|                          | 2017 | 2.1 (0.2, 3.9)                                  | <b>31.9 (20.4, 43.4)</b>    |

\* Rate per 100,000 population.

Statistically significant years are presented in bold font.

Table S3. Comparison of estimated influenza-attributable hospitalisation and mortality rate between two Australian studies.

a. Influenza-attributable hospitalisation rate per 100,000 population

|                                                 | Age (50-64 years)       |                            |                      |                         |
|-------------------------------------------------|-------------------------|----------------------------|----------------------|-------------------------|
|                                                 | IP*                     | Respiratory                | MI***                | Circulatory             |
| <i>This study</i><br>(Jun 2001-2017)            | 32.3<br>(31.2, 33.3)    | 78.9<br>(76.3, 81.4)       | 1.2<br>(0.1, 2.4)    | 0.7<br>(-5.2, 6.6)      |
| Newall et al. <sup>1</sup><br>(Jul1998-Jun2005) | 33.3<br>(23.2, 43.4)    | 57.6 **<br>(32.5, 82.8)    | -                    | -1.5<br>(-58.8, 55.8)   |
|                                                 | Age (≥65 years)         |                            |                      |                         |
| <i>This study</i>                               | 123.6<br>(120.2, 126.9) | 287.5<br>(279.8, 295.3)    | 13.9<br>(11.2, 16.6) | 57.2<br>(42.1, 72.3)    |
| Newall et al. <sup>1</sup>                      | 157.4<br>(108.4, 206.5) | 282.0 **<br>(183.7, 380.3) | -                    | 39.6<br>(-114.9, 194.1) |

IP (J09-J18); Respiratory (J00-J99); MI (I21-I22); Circulatory (I00-I99)

\*IP, Influenza/pneumonia; \*\* Other respiratory; \*\*\*MI, Myocardial infraction

b. Influenza-attributable mortality rate per 100,000 population

|                                                 | Age (50-64 years)      |                           |                      |                        |
|-------------------------------------------------|------------------------|---------------------------|----------------------|------------------------|
|                                                 | IP*                    | Respiratory               | MI***                | Circulatory            |
| <i>This study</i><br>(2001-2017)                | 0.5<br>(0.4, 0.6)      | 0.9<br>(0.7, 1.2)         | 0.3<br>(0.0, 0.6)    | 0.9<br>(0.4, 1.4)      |
| Newall et al. <sup>1</sup><br>(Jul1998-Jun2005) | 0.6<br>(0.3 to 1.0)    | 2.1 **<br>(1.2 to 3.0)    | -                    | 1.4<br>(-0.6 to 3.4)   |
|                                                 | Age (≥65 years)        |                           |                      |                        |
| <i>This study</i>                               | 7.6<br>(7.0, 8.2)      | 18.2<br>(16.9, 19.4)      | 12.8<br>(11.3, 14.3) | 37.7<br>(34.4, 41.0)   |
| Newall et al. <sup>1</sup>                      | 17.6<br>(12.9 to 22.3) | 24.4 **<br>(18.8 to 30.0) | -                    | 49.3<br>(27.0 to 71.6) |

IP (J09-J18); Respiratory (J00-J99); MI (I21-I22); Circulatory (I00-I99).

\*IP, Influenza/pneumonia; \*\* Other respiratory; \*\*\*MI, Myocardial infraction

Ref:

1. Newall AT, Wood JG, MacIntyre CR. Influenza-related hospitalisation and death in Australians aged 50 years and older. *Vaccine*.2008;26(17):2135-2141.

**Figures:**

Figure S1: Observed rate of hospitalisation with principal diagnosis of respiratory disease.

a.  $\geq 65$  years

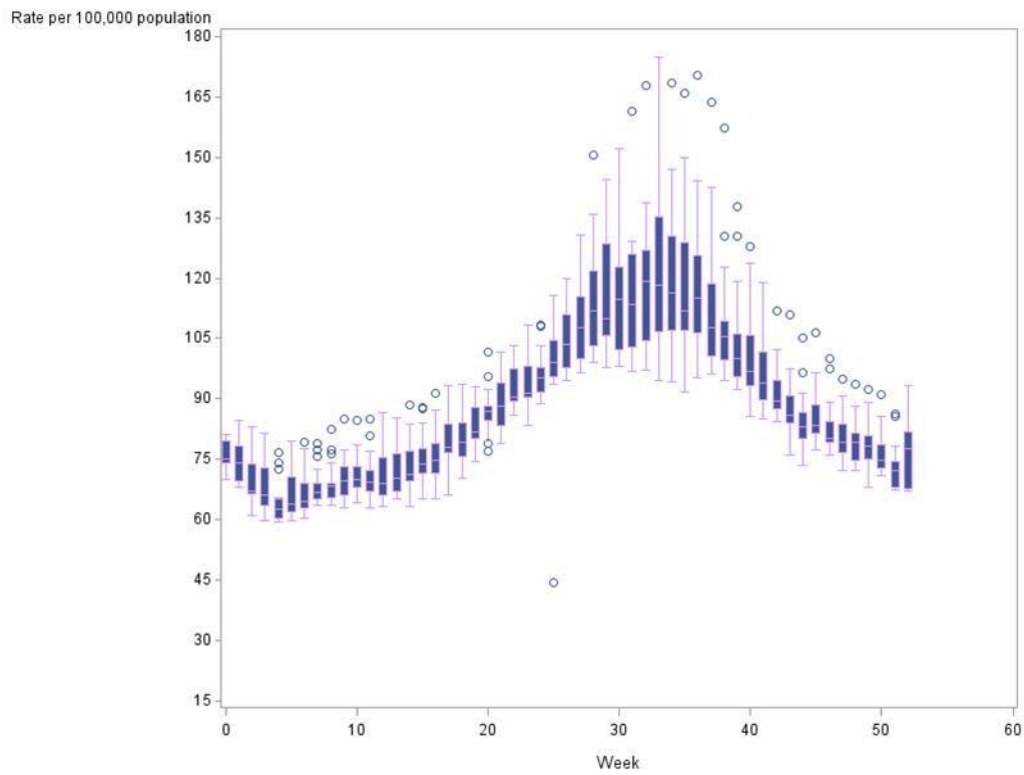

b. 50-64 years

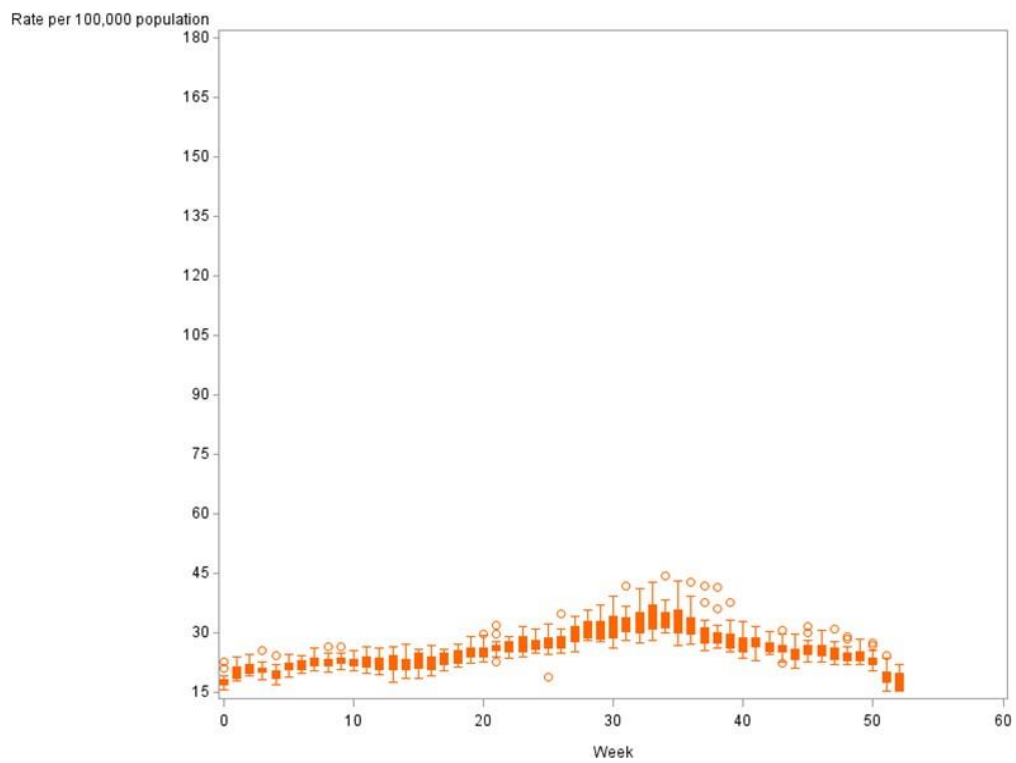

Figure S2: Observed rate of hospitalisation with principal diagnosis of influenza/pneumonia.

a.  $\geq 65$  years

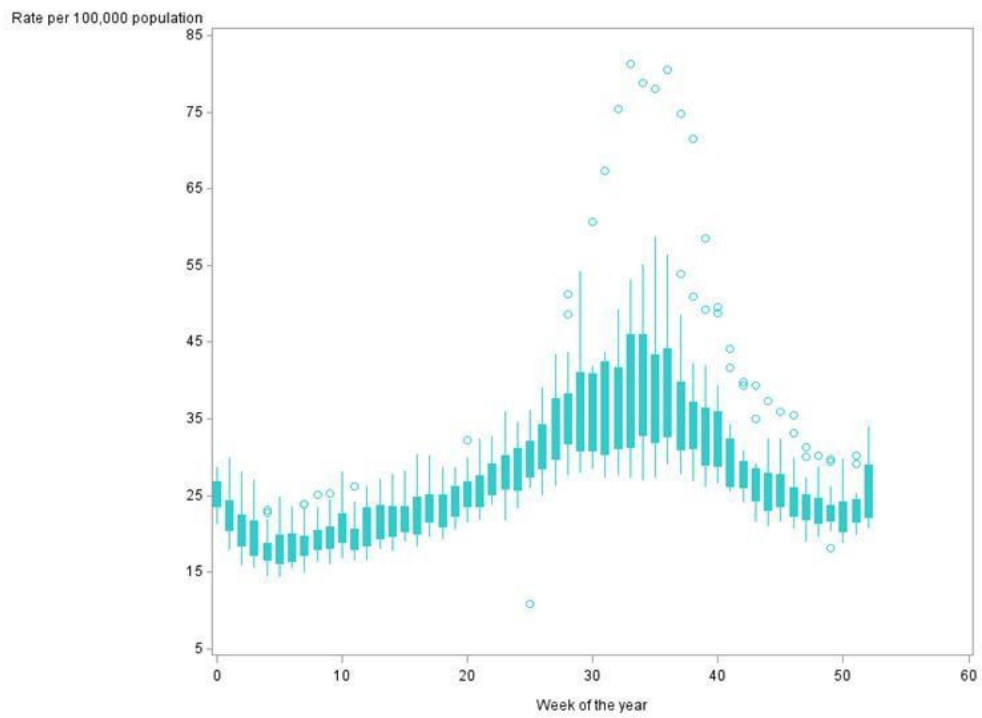

b. 50-64 years

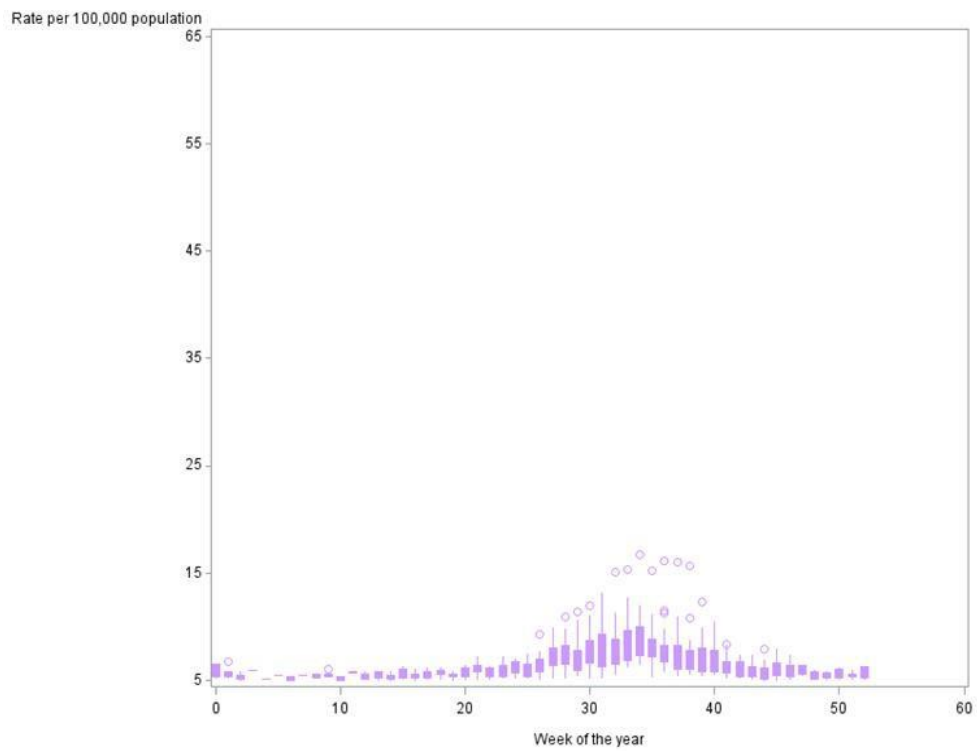

Figure S3: Observed rate of hospitalisation with principal diagnosis of circulatory disease.

a.  $\geq 65$  years

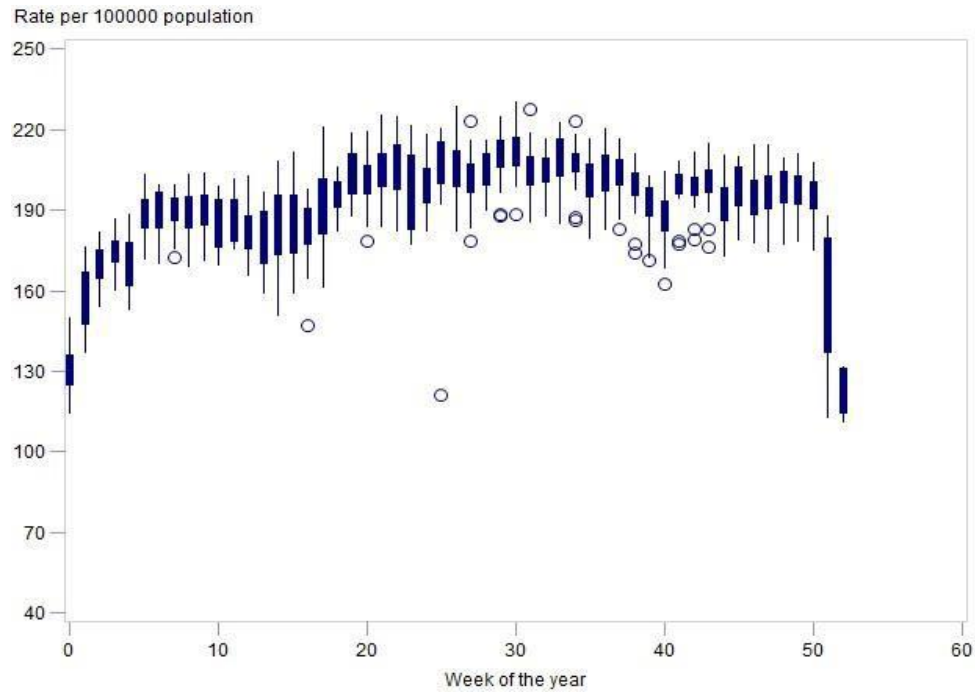

b. 50-64 years

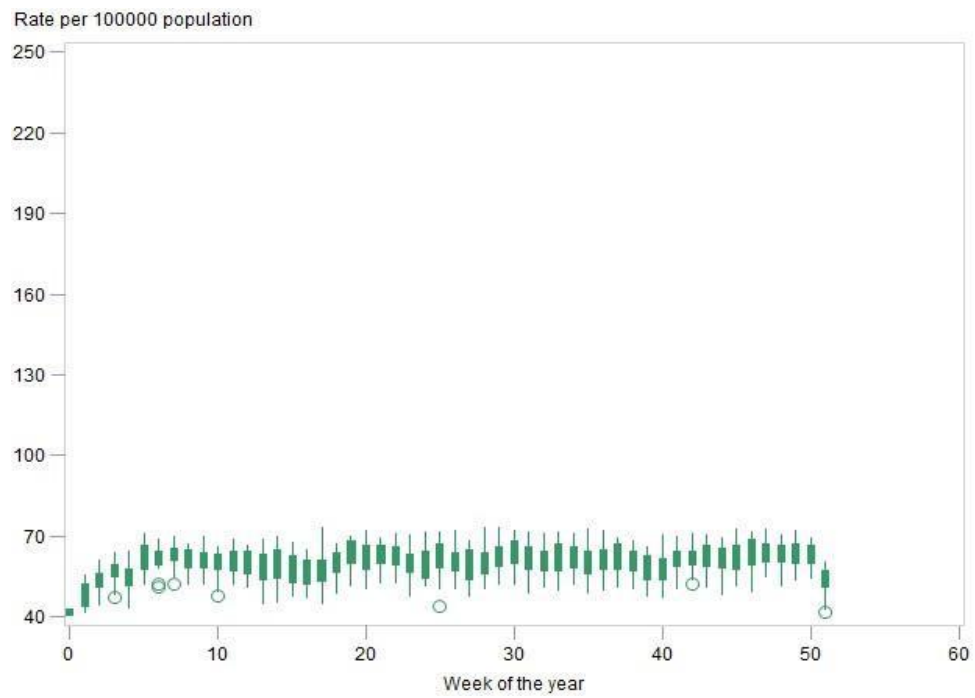



Figure S4: Observed rate of hospitalisation with principal diagnosis of myocardial infraction  
a.  $\geq 65$  years

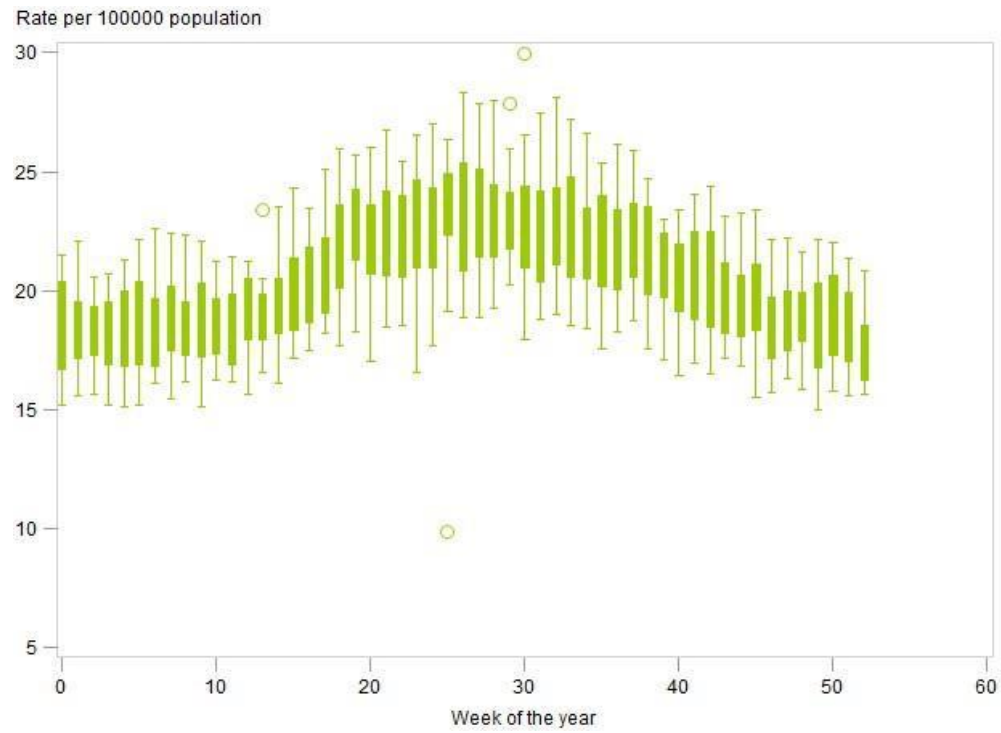

b. 50-64 years

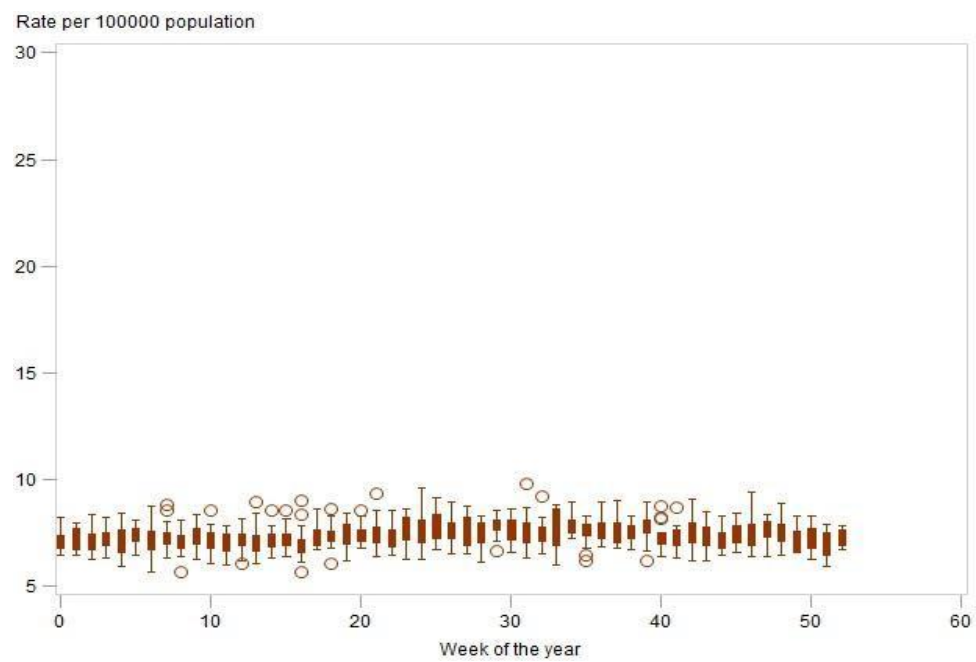

Figure S5. Laboratory-confirmed influenza notifications by type, subtype and year, Australia, 2001-2017.

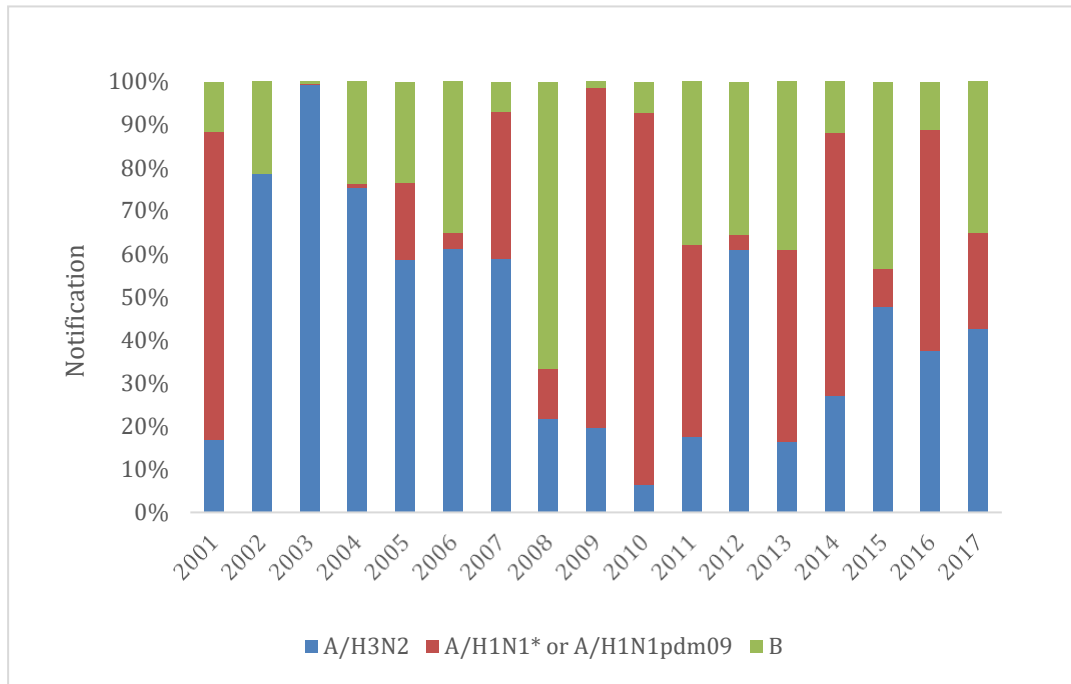

\* A/H1N1 strain was replaced by A/H1N1pdm09 from 2009 onwards.

Source: NNDSS (WHOCC)

## Hospitalisation

Figure S6: Estimated, observed and baseline hospitalisation rate\* of influenza-attributable circulatory and myocardial infraction, by year and age group, Australia, 2001-2017.

### a. Circulatory

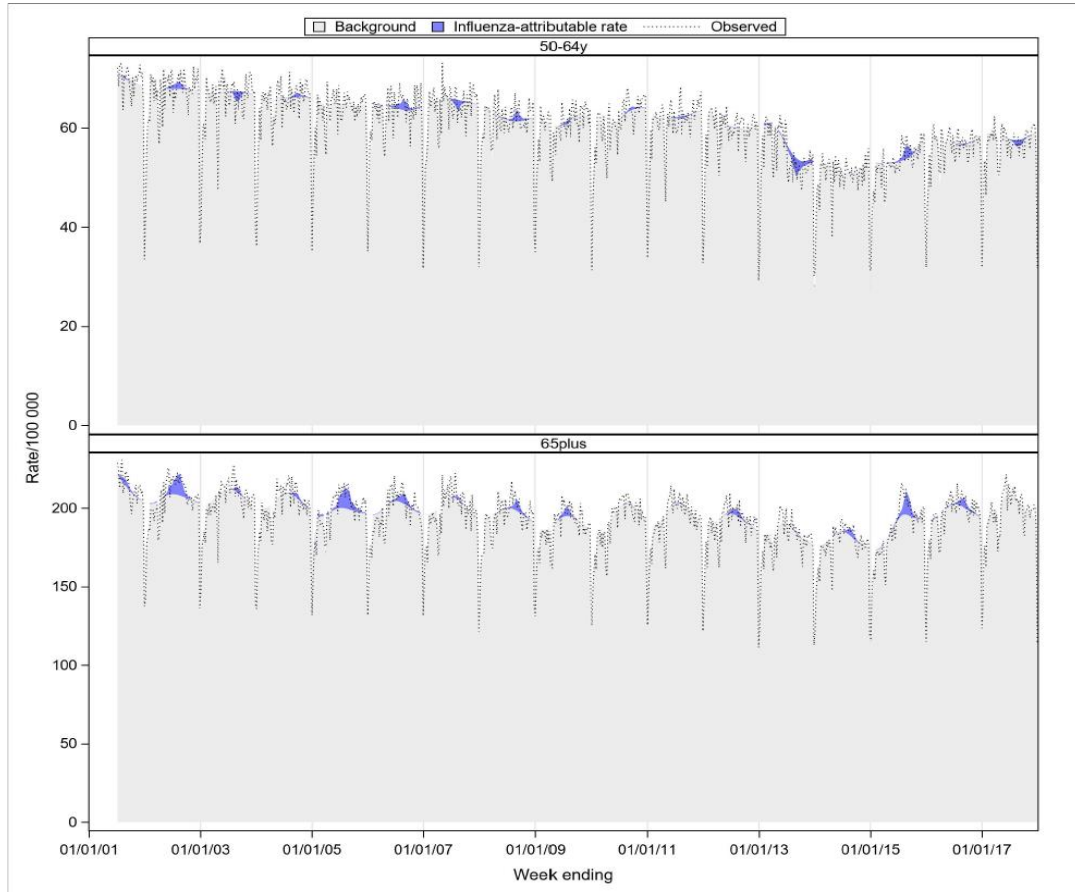

Note: Blue-coloured area indicates rate of influenza-attributable hospitalisation and light grey area denotes baseline hospitalisation rate in the graph.

\* Rate per 100,000 population.

## b. Myocardial infraction

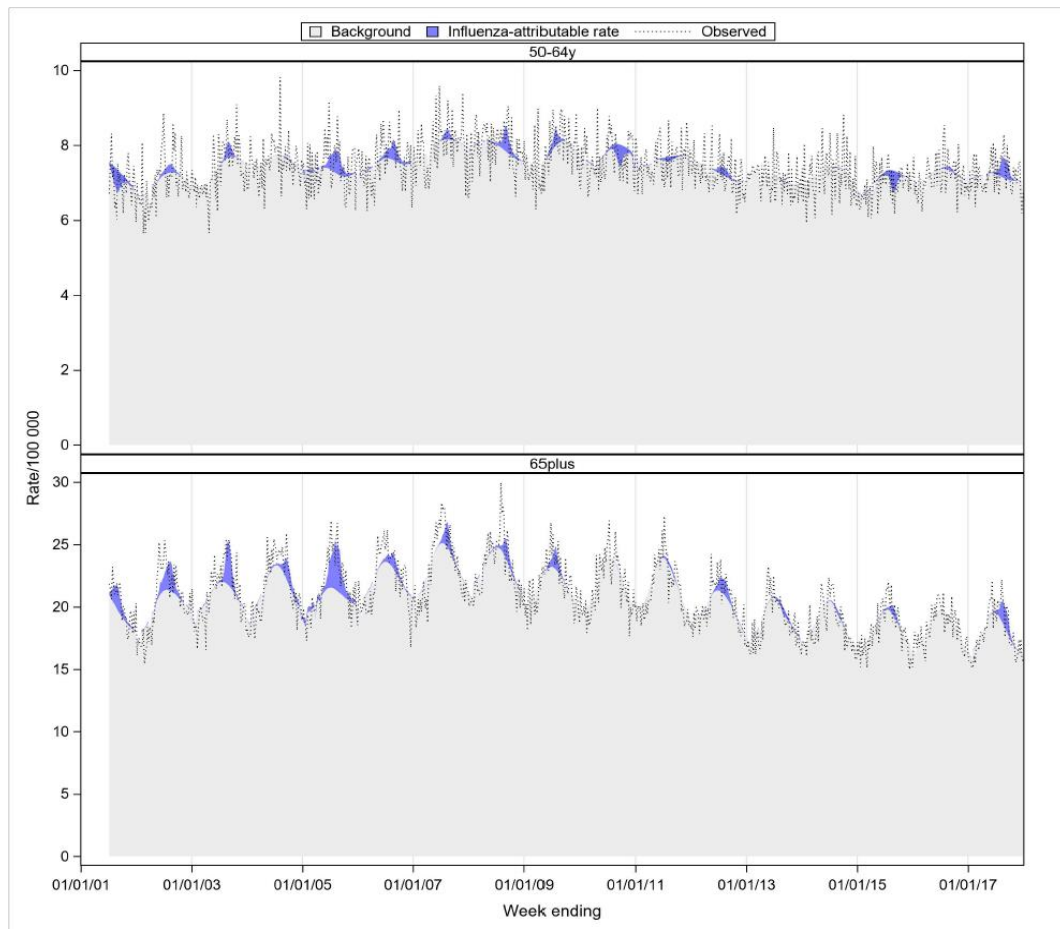

Note: Blue-coloured area indicates rate of influenza-attributable hospitalisation and light grey area denotes baseline hospitalisation rate in the graph.

\* Rate per 100,000 population.

## Mortality

Figure S7: Estimated, observed and baseline rate\* of influenza-attributable influenza/pneumonia and respiratory death, by year and age group, Australia, 2001- 2017.

### a. Influenza and pneumonia

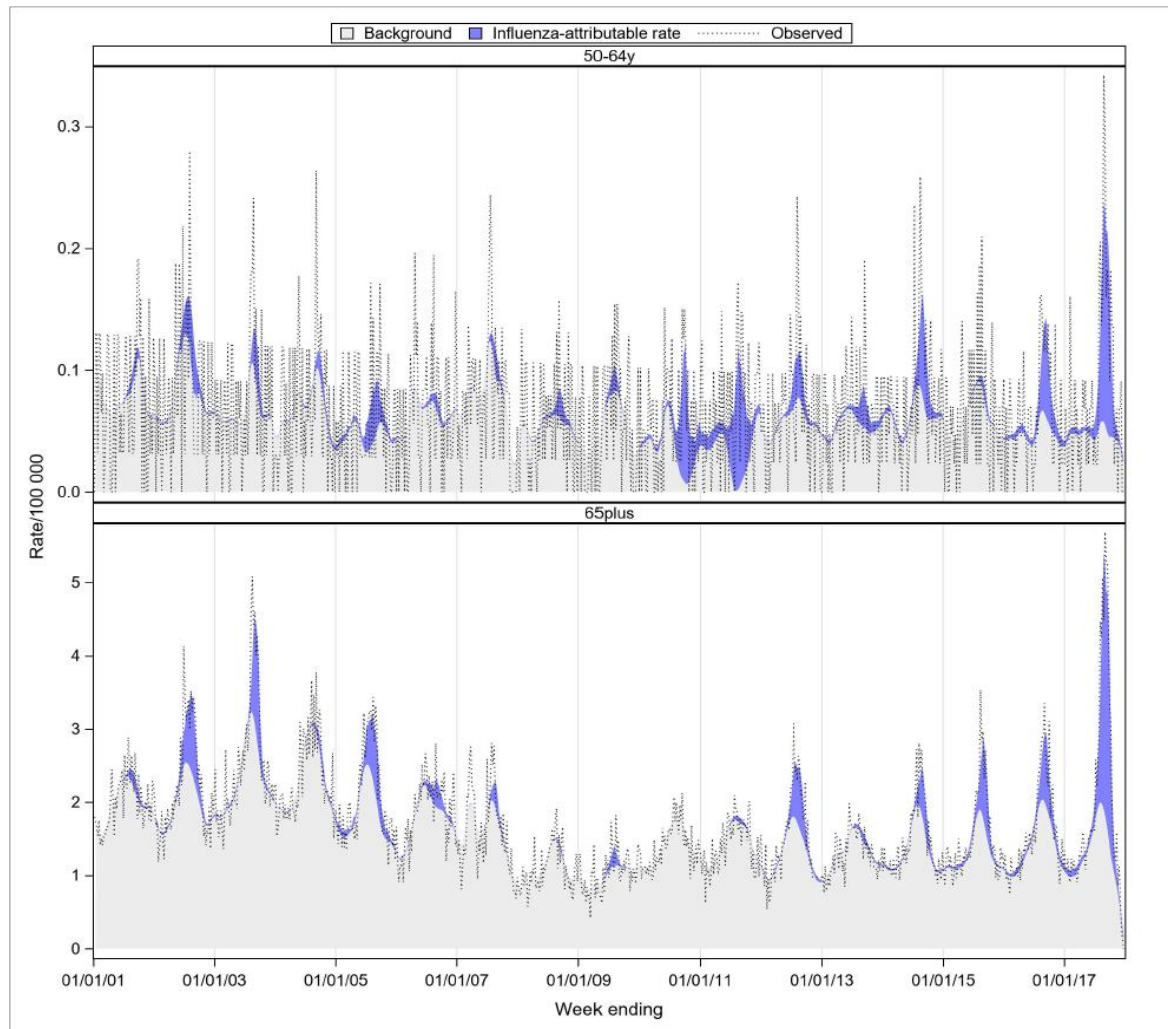

Note: Blue-coloured area indicates rate of influenza-attributable death and light grey area denotes baseline death rate in the graph.

\* Rate per 100,000 population.

## b. Respiratory

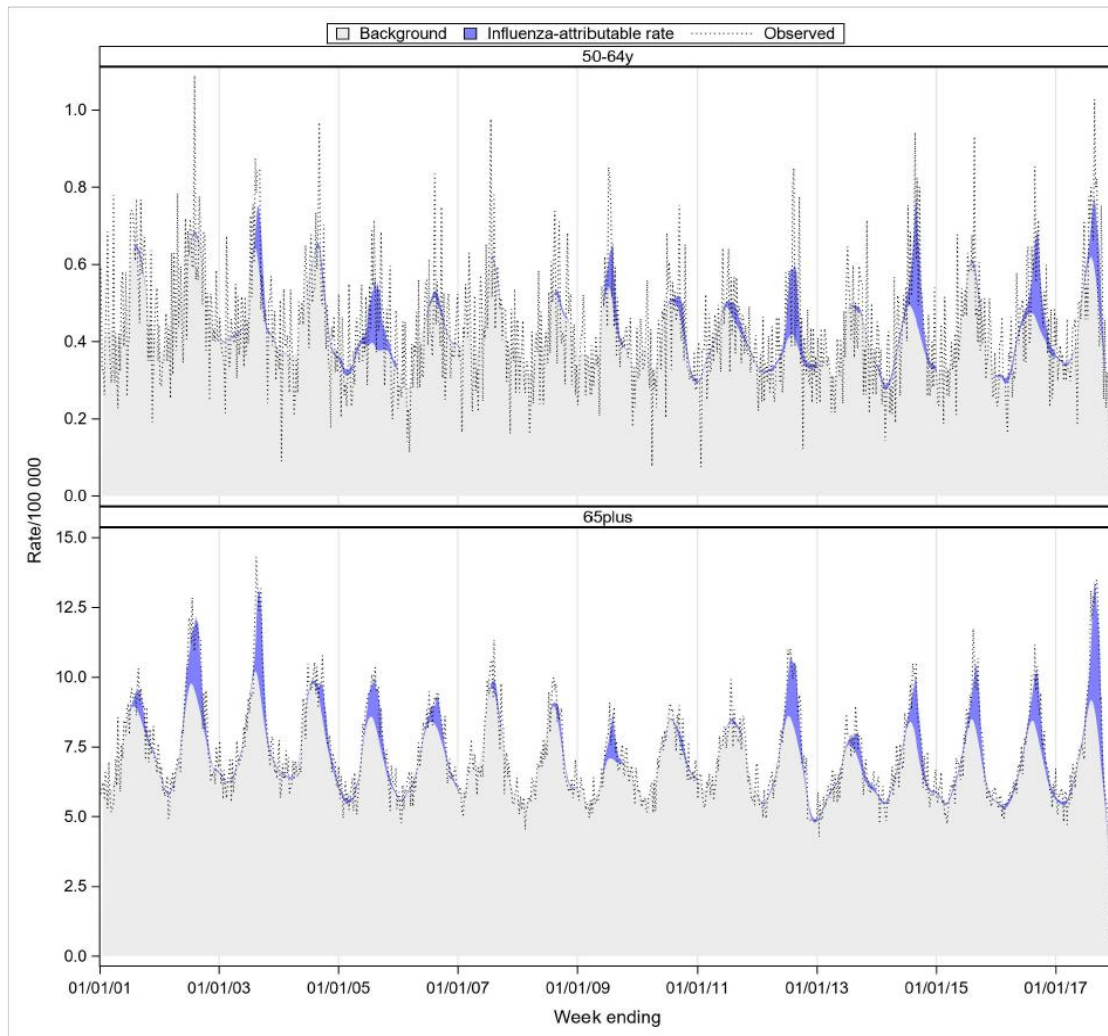

Note: Blue-coloured area indicates rate of influenza-attributable death and light grey area denotes baseline death rate in the graph.

\* Rate per 100,000 population.
